# Supplementary material
Source: MDPI journal article supplement (https://www.mdpi.com/2227-9040/10/7/284)
Supplement: s1 [file s1]

# Visualization of Antimicrobial-Induced Bacterial Membrane Disruption with a Bicolor AIEgen

Chengcheng Zhou <sup>1,\*</sup>, Zeyu Ding <sup>1</sup>, Qiaoni Guo <sup>1</sup> and Meijuan Jiang <sup>2,\*</sup>

<sup>1</sup> School of Chemistry and Chemical Engineering, Yangzhou University, Yangzhou 225002, China; mz120200676@stu.yzu.edu.cn (Z.D.); mx120200423@yzu.edu.cn (Q.G.)

<sup>2</sup> Department of Chemistry, The Hong Kong University of Science and Technology, Clear Water Bay, Kowloon, Hong Kong, China

\* Correspondence: zhoucc@yzu.edu.cn (C.Z.); mjiangae@connect.ust.hk (M.J.)

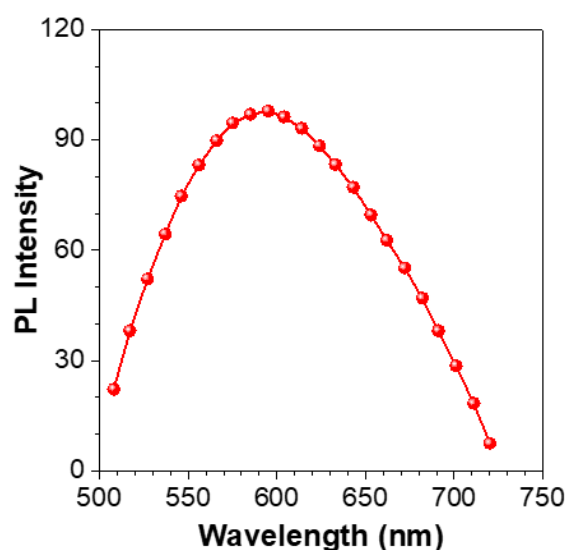

**Figure S1.** In situ fluorescence spectrum of *E. coli* treated by 75% alcohol after stained with 10  $\mu$ M of IQ-Cm collected in the wavelength scanning mode of CLSM. Ex: 488 nm.

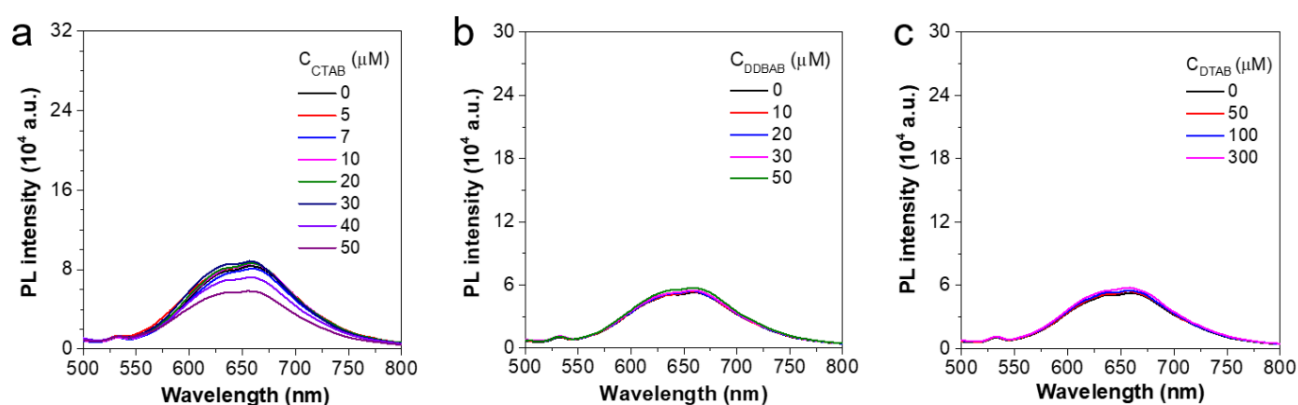

**Figure S2.** The effect of the antimicrobials on the emission of IQ-Cm. Fluorescence spectra of IQ-Cm (10  $\mu$ M) in PBS solution with different concentration of three antimicrobials in the absence of *E. coli*, where (a) CTAB, (b) DDBAB or (c) DTAB, respectively.

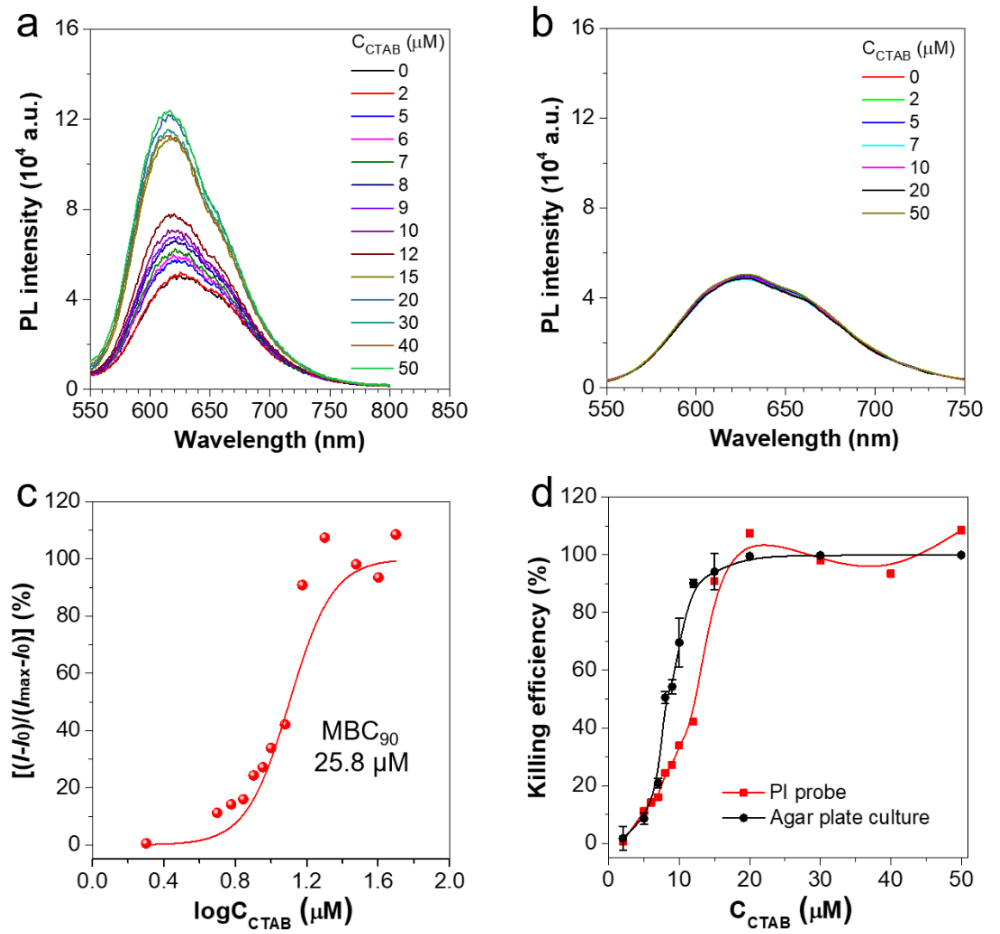

**Figure S3.** Evaluation of antimicrobial activity of CTAB by PI probe. (a) and (b) Fluorescence spectra of PI (5 µg/mL) with different concentrations of CTAB in the presence and the absence of *E. coli*, respectively. (c) Plot of relative fluorescence intensities  $[(I - I_0)/(I_{max} - I_0)]\%$  of PI in *E. coli* PBS solution versus CTAB concentration, where  $I$  and  $I_{max}$  correspond to the fluorescence intensity and the achievable maximum emission of PI at 615 nm in the presence of *E. coli* treated by different concentration of CTAB, respectively, and  $I_0$  is the initial emission in the group with *E. coli* but no CTAB. (d) The plots of antimicrobial activity towards *E. coli* of CTAB versus their concentration, evaluated by PI and agar plate culture.

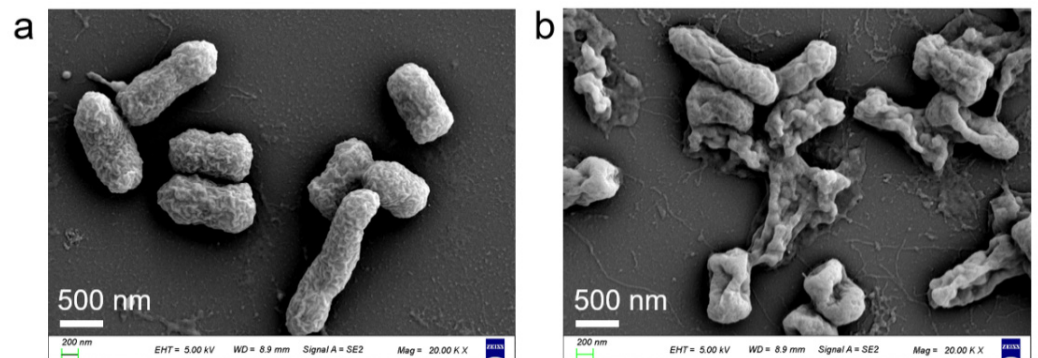

**Figure S4.** SEM images of *E. coli* without (a) and with (b) incubation with 20 µM of CTAB for 30 min.

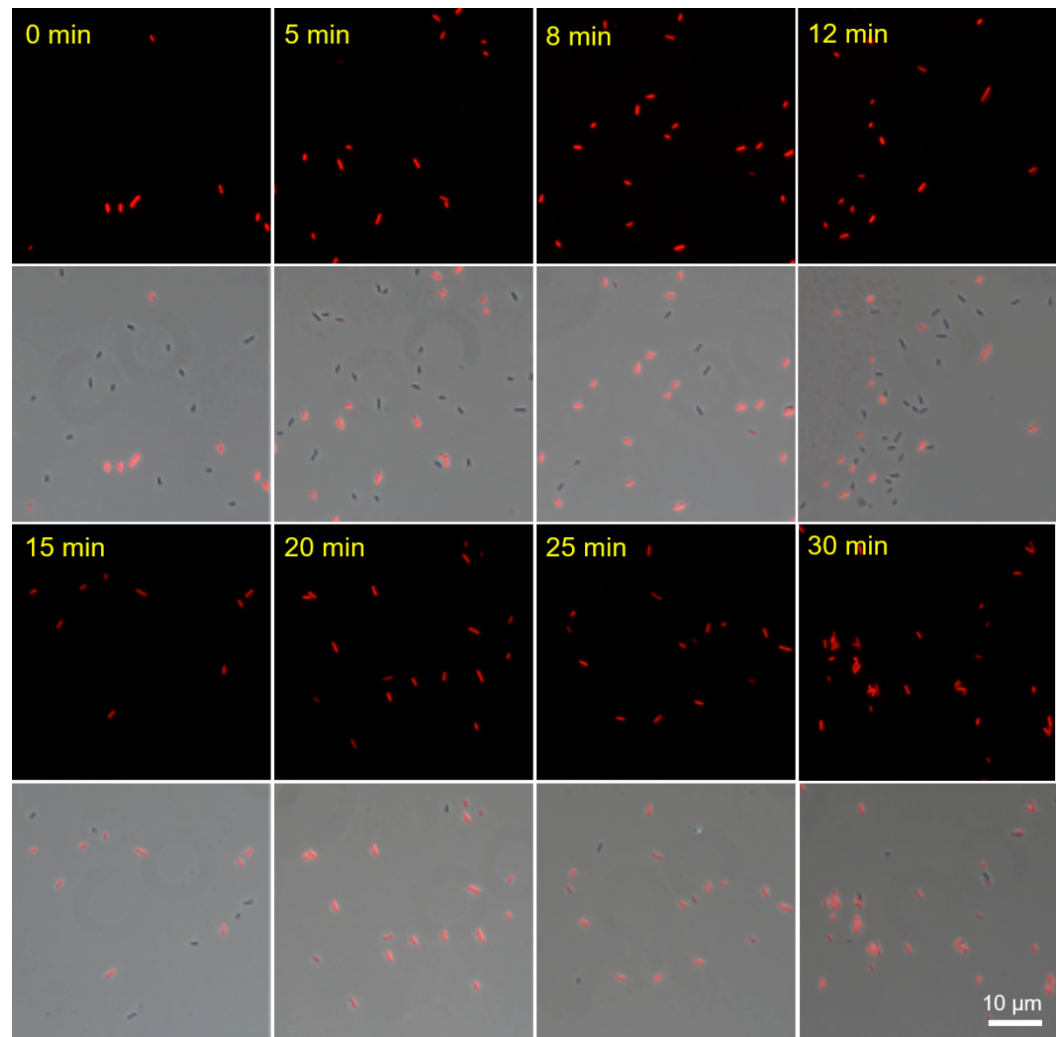

**Figure S5.** Fluorescence and merged images of *E. coli* treated by 20 µM of CTAB for different time and then stained by 5 µg/ml of PI for 10 min. Excitation filter = 510–550 nm, dichroic mirror = 570 nm, emission filter = 590 nm long pass.
